# Supplementary material for: A comparison of five methods to predict genomic breeding values of dairy bulls from genome-wide SNP markers
Source: Springer Nature journal article supplement (doi:10.1186/1297-9686-41-56), 2009-12-01

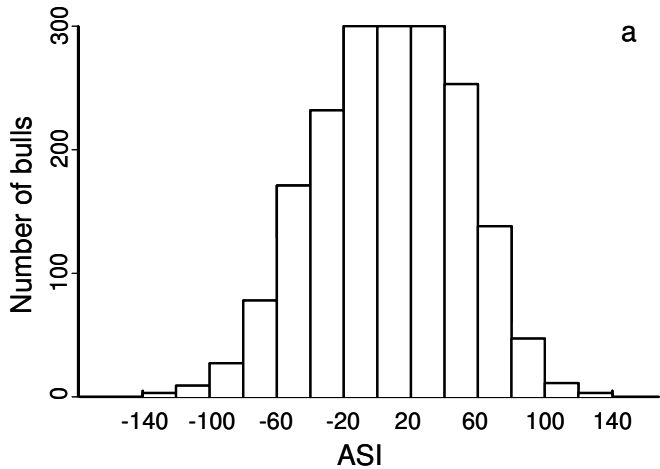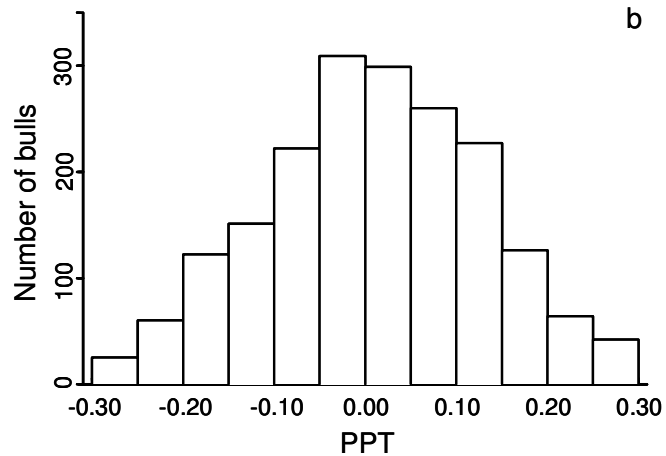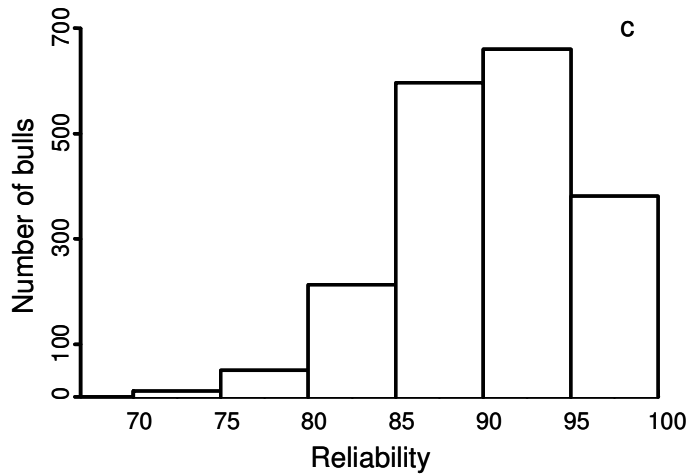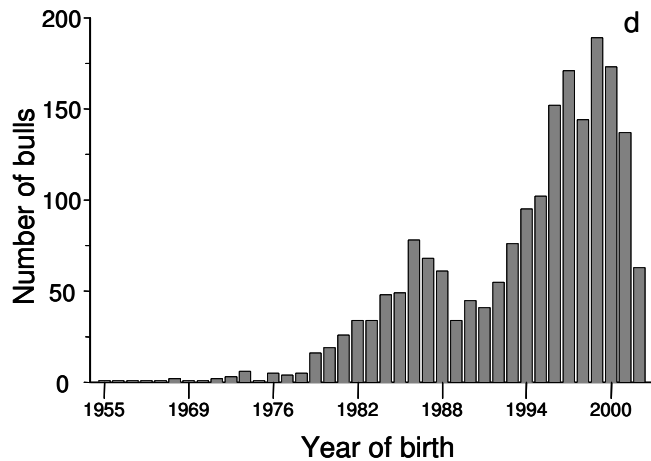

Supplement: 12711_2009_2670_MOESM2_ESM.pdf [file 12711_2009_2670_MOESM2_ESM.pdf]
