# Supplementary material for: A comparison of five methods to predict genomic breeding values of dairy bulls from genome-wide SNP markers
Source: Springer Nature journal article supplement (doi:10.1186/1297-9686-41-56), 2009-12-01
Supplement: Additional file 1 [file 1297-9686-41-56-s1.doc]

**Model-based means from ANOVA of factors affecting correlation (rEBV,MBV) between EBV and MBV and regression coefficient (logebEBV,MBV) of EBV on MBV**

**Metric: rEBV,MBV**, Factor: Method

| FRLS | RR_BLUP | Bayes-R | SVR | PLSR |
| --- | --- | --- | --- | --- |
| 0.368 a | 0.475 b | 0.499 b | 0.525 c | 0.487 b |

**Metric: rEBV,MBV,** Factor: Trait.Year

| Trait.Year | CV | 1998 | 1999 | 2000 | 2001 | 2002 |
| --- | --- | --- | --- | --- | --- | --- |
| ASI | 0.674h | 0.352b | 0.356b | 0.0402c | 0.332b | 0.276a |
| PPT | 0.536ef | 0.582g | 0.572fg | 0.512de | 0.580g | 0.476d |

**Metric: logebEBV,MBV**, Factor: Trait.Method

| Trait.Method | FRLS | RR_BLUP | Bayes-R | SVR | PLSR |
| --- | --- | --- | --- | --- | --- |
| ASI | -1.373a | -0.304c | -0.311c | -0.303c | -0.598b |
| PPT | -0.624b | -0.038d | 0.0892d | 0.003d | -0.287c |

**Metric: logebEBV,MBV**, Factor: Trait.Year

| Trait.Year | CV | 1998 | 1999 | 2000 | 2001 | 2002 |
| --- | --- | --- | --- | --- | --- | --- |
| ASI | -0.041d | -0.813ab | -0.640bc | -0.504c | -0.591c | -0.879a |
| PPT | -0.122d | -0.050d | -0.156d | -0.182d | -0.019d | -0.495c |

The regression coefficient was loge-transformed to account for non-normality and unstable variance. Estimates with different superscript are significantly different at the 0.05 significance level.
